# Supplementary material for: The mechanism of Co oxyhydroxide nano-islands deposited on a Pt surface to promote the oxygen reduction reaction at the cathode of fuel cells
Source: Royal Society of Chemistry journal article supplement (doi:10.1039/d0ra08645b), 2020-01-01
Supplement: d0ra08645b1.pdf [file d0ra08645b1.pdf]

## SUPPLEMENTARY INFORMATION

### **The Enhancement Mechanism of Co Oxyhydroxide groups Deposited on Pt Surface for Oxygen Reduction Reaction with Cathode in Fuel Cell**

*Jinghao Lu<sup>a</sup>, Libin Yang<sup>a,\*</sup>, Wei Guo<sup>a</sup>, Songtao Xiao<sup>b</sup>, Lingyu Wang<sup>b</sup>, Yinggen OuYang<sup>b</sup>, Peng Gao<sup>a</sup>*

<sup>a</sup>College of Chemical Engineering and Materials Science/Tianjin Key Laboratory of Brine Chemical Engineering and Resource Eco-utilization, Tianjin University of Science and Technology. E-mail: yanglibin@tust.edu.cn (Y.L); Tel.:86-13752339079 (Y.LB)

<sup>b</sup>Department of Radiochemistry, China Institute of Atomic Energy, Beijing 102413, China

\*Corresponding author: Libin Yang (Email: yanglibin@tust.edu.cn)

| Reference | Product                                   | Ink                |                         |                   |             | Amount of ink coating (ul) | Working electrode size (mm) | Electrolyte solution   | Limiting current density (mA/cm <sup>2</sup> ) | Pt loading (ug/cm <sup>2</sup> ) |
|-----------|-------------------------------------------|--------------------|-------------------------|-------------------|-------------|----------------------------|-----------------------------|------------------------|------------------------------------------------|----------------------------------|
|           |                                           | Catalyst mass (mg) | Solvent volume          | Water volume (ml) | Nafion (ul) |                            |                             |                        |                                                |                                  |
| 1         | PtPb/vxc-72                               | 1                  | 0                       | 1                 | 15          | 20                         | 5                           | 0.1M HClO <sub>4</sub> | 5.6                                            | 15.3                             |
| 2         | PtNi/vxc-72                               | 2                  | 1ml methanol            | 0                 | none        | 10                         | 3                           | 0.1M HClO <sub>4</sub> | 5.8                                            | 28                               |
| 3         | Pt <sub>3</sub> Co/vxc-72                 | 2                  | 0.2ml Isopropyl alcohol | 0.8               | 20          | 10                         | 5                           | 0.1M HClO <sub>4</sub> | 6                                              | 20                               |
| 4         | L <sub>1</sub> -PtCo/vxc-72               | 2                  | 0.9ml Isopropyl alcohol | 0                 | 100         | 10                         | 5                           | 0.1M HClO <sub>4</sub> | 5.8                                            | 20                               |
| 5         | Pt <sub>75</sub> Co <sub>25</sub>         | 1                  | 1ml ethanol             | 0                 | 4           | 6                          | 3                           | 0.5M KOH               | 6                                              | 40                               |
| 6         | Pt <sub>78</sub> Co <sub>22</sub> NCs/rGO | 1                  | none                    | 1                 | 4           | 3                          | 3                           | 0.5M KOH               | 6                                              | 20                               |
| 8         | PtCoNi/vxc-72                             | 1                  | 1ml ethanol             | 0                 | 40          | 3                          | 3                           | 0.5M KOH               | 6                                              | 18                               |
| This work | Pt/vxc-72                                 | 2                  | 0.5ml ethanol           | 0.5               | 20          | 3                          | 3                           | 0.1M KOH               | 5.6                                            | 16                               |
| This work | Pt-OCO <sub>2</sub> H/vxc-72              | 2                  | 0.5ml ethanol           | 0.5               | 20          | 3                          | 3                           | 0.1M KOH               | 5.6                                            | 14.4                             |

Table S1 Summary of ink coating amount, catalyst amount and Pt loading amount.
